# Supplementary material for: Genetically predicted lifestyle factors, socioeconomic status and risk of coronary artery disease in individuals with diabetes: a Mendelian randomization study
Source: Frontiers journal article supplement (doi:10.3389/fpubh.2023.1284958), 2023-12-22

# **Genetically predicted lifestyle factors, Socioeconomic status and risk for coronary artery disease in individuals with diabetes: a Mendelian randomization study**

## **Contents:**

Supplementary figure 1(a). Leave-one-out analysis in the MR analysis between smoking initiation and the risk of CAD in individuals with diabetes;

Supplementary figure 1(b). Leave-one-out analysis in the MR analysis between lifetime smoking index and the risk of CAD in individuals with diabetes;

Supplementary figure 1(c). Leave-one-out analysis in the MR analysis between alcohol drinking and the risk of CAD in individuals with diabetes;

Supplementary figure 1(d). Leave-one-out analysis in the MR analysis between sleep duration and the risk of CAD in individuals with diabetes;

Supplementary figure 1(e). Leave-one-out analysis in the MR analysis between insomnia and the risk of CAD in individuals with diabetes;

Supplementary figure 1(f). Leave-one-out analysis in the MR analysis between AMPA and the risk of CAD in individuals with diabetes;

Supplementary figure 1(g). Leave-one-out analysis in the MR analysis between coffee consumption and the risk of CAD in individuals with diabetes;

Supplementary figure 1(h). Leave-one-out analysis in the MR analysis between educational attainment and the risk of CAD in individuals with diabetes;

Supplementary figure 1(i). Leave-one-out analysis in the MR analysis between average total household income before tax and the risk of CAD in individuals with diabetes;

Supplementary figure 1(j). Leave-one-out analysis in the MR analysis between Townsend deprivation index and the risk of CAD in individuals with diabetes.

a

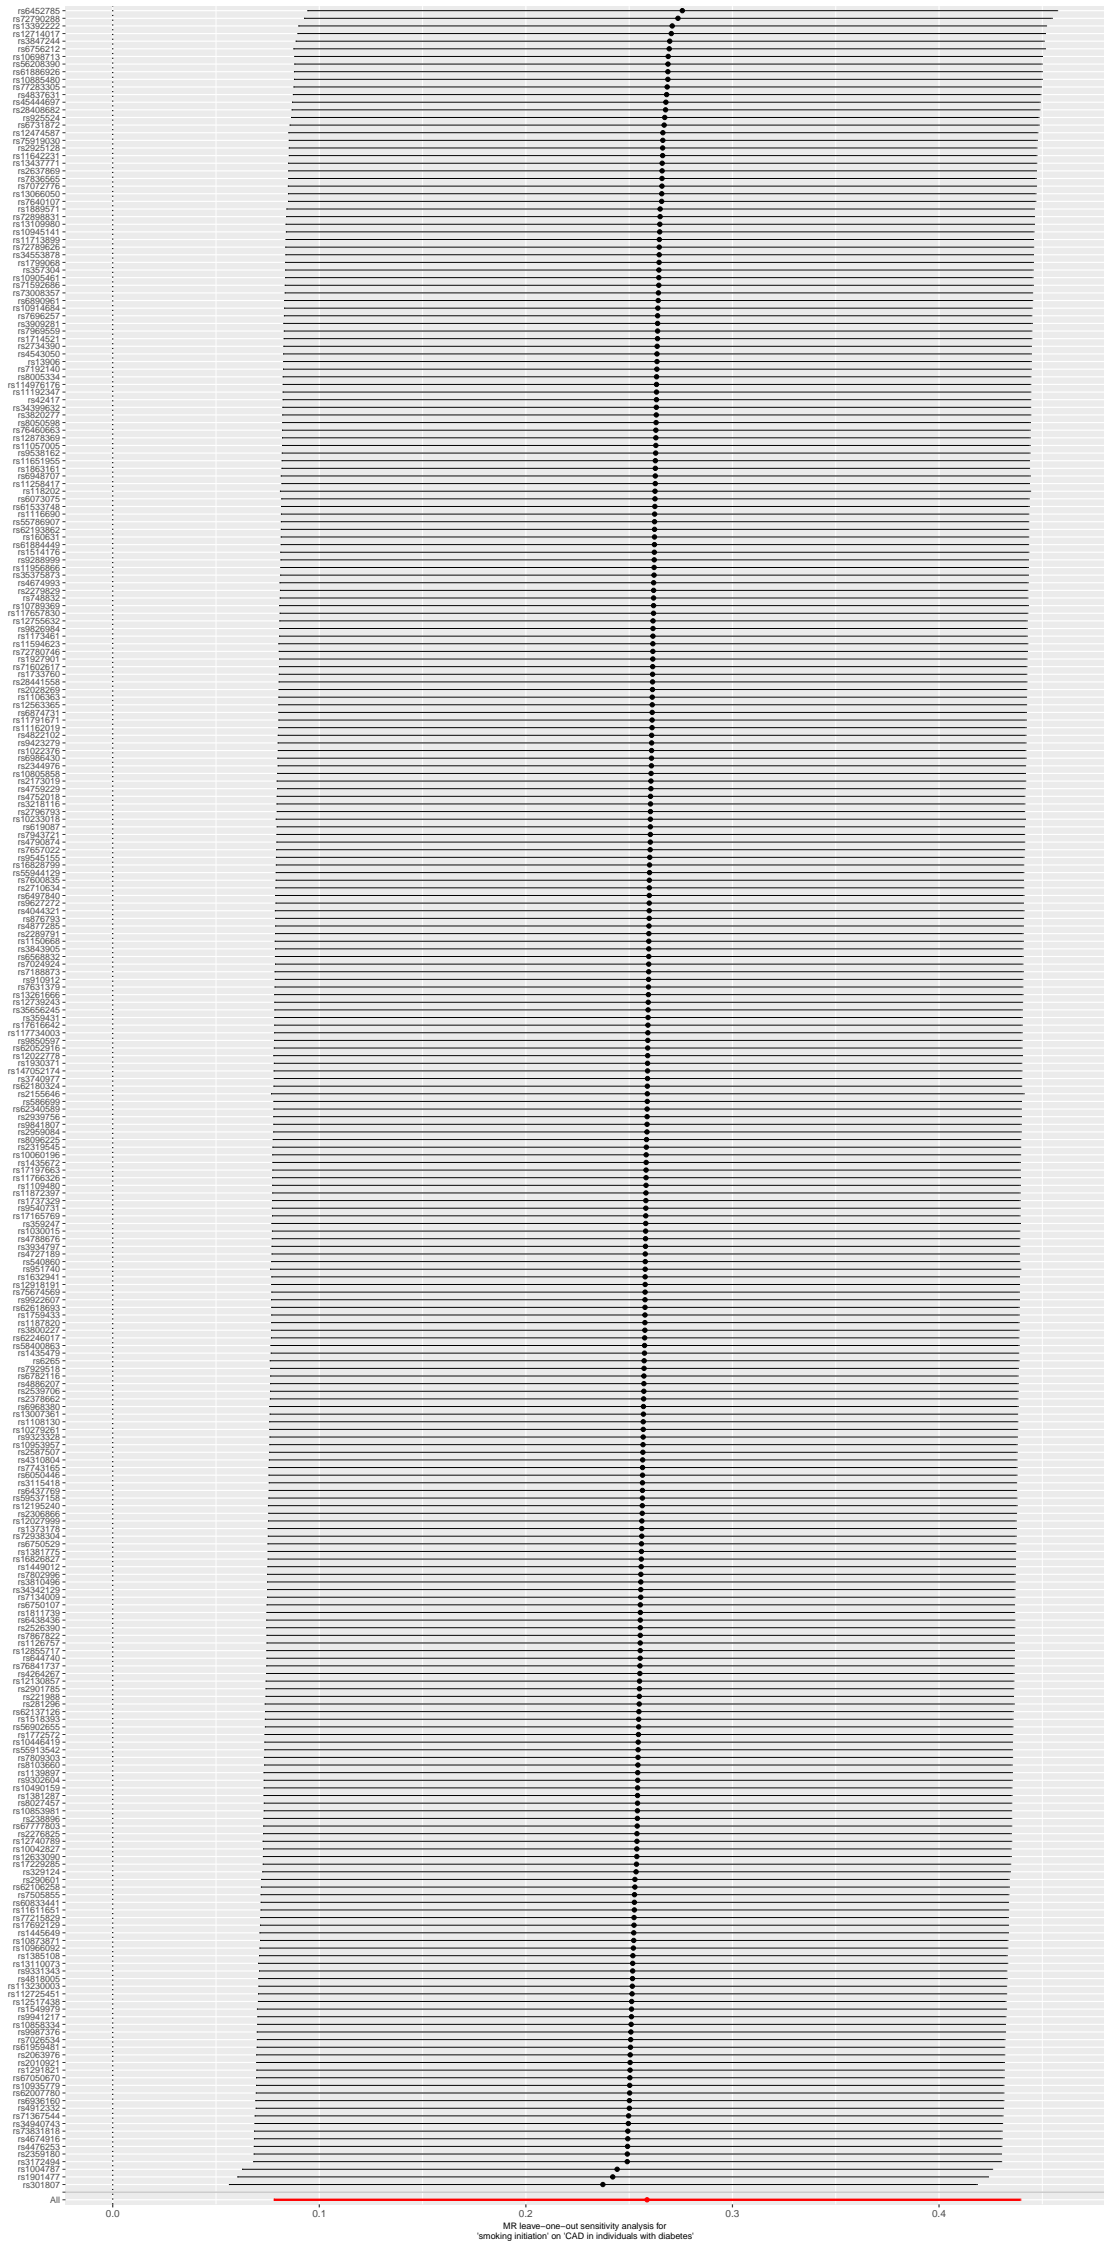

b

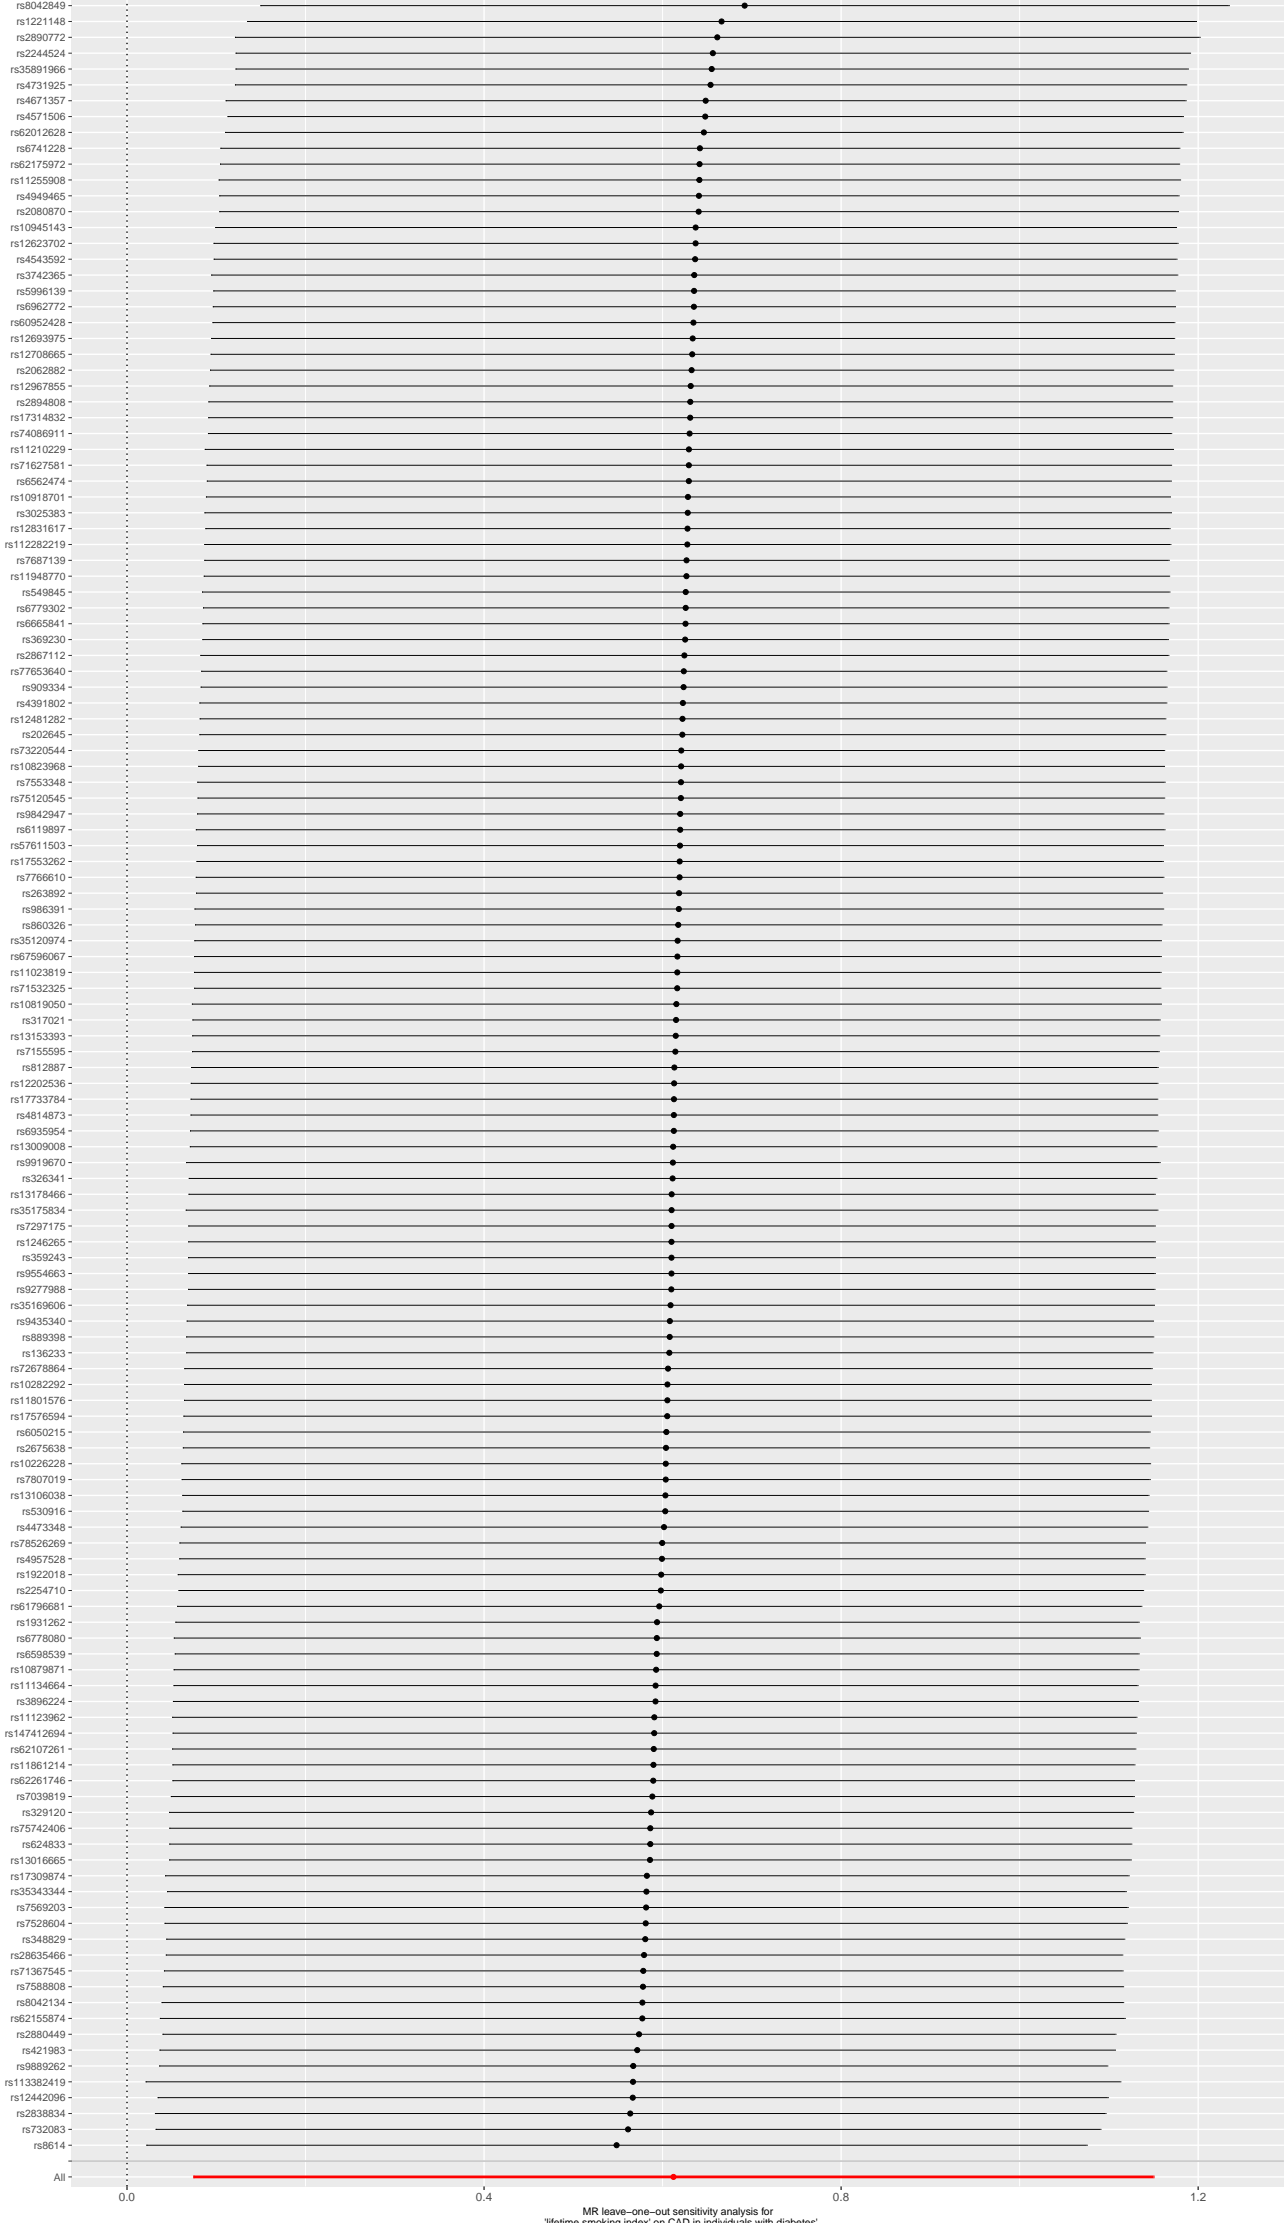

C

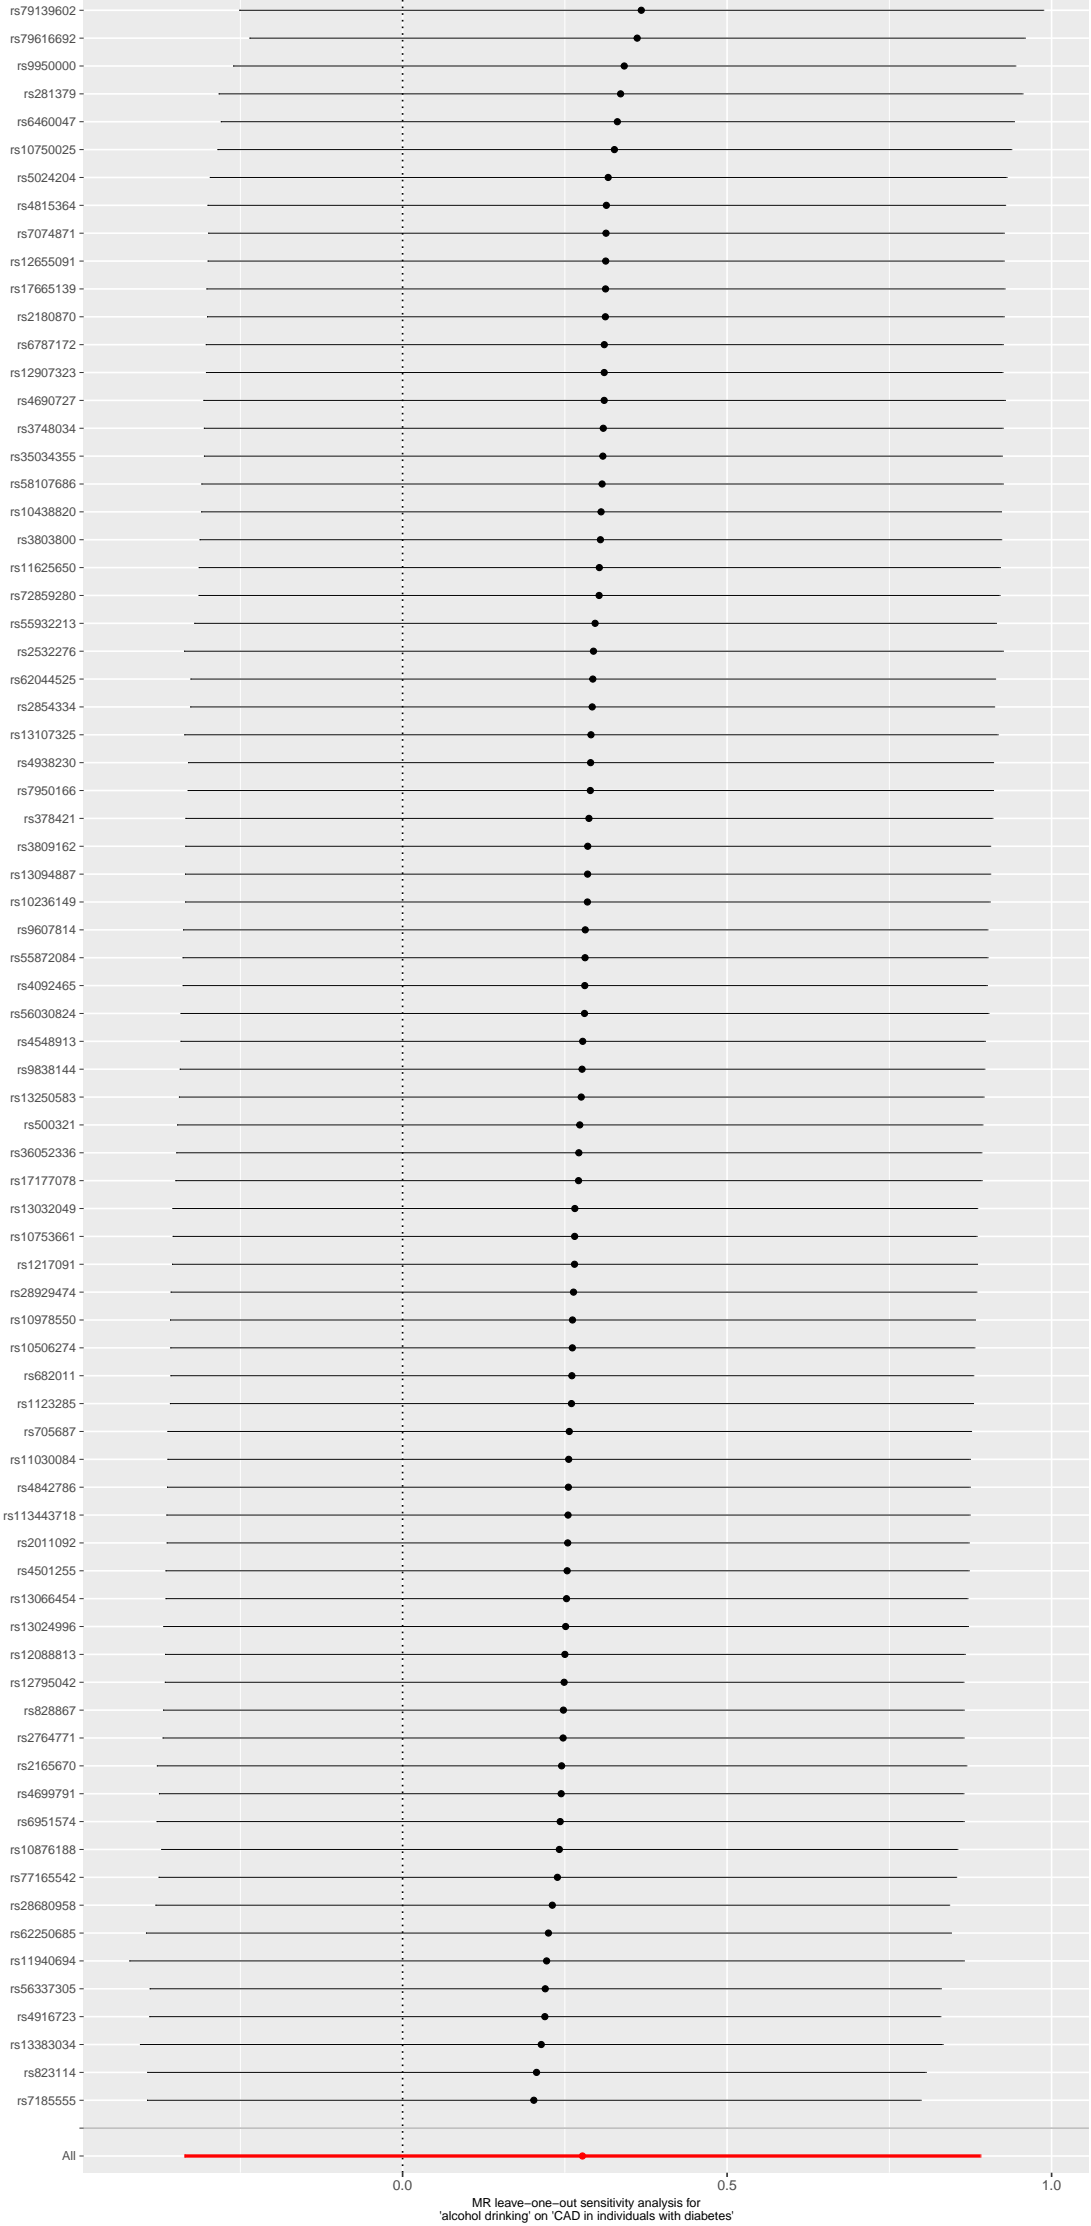

d

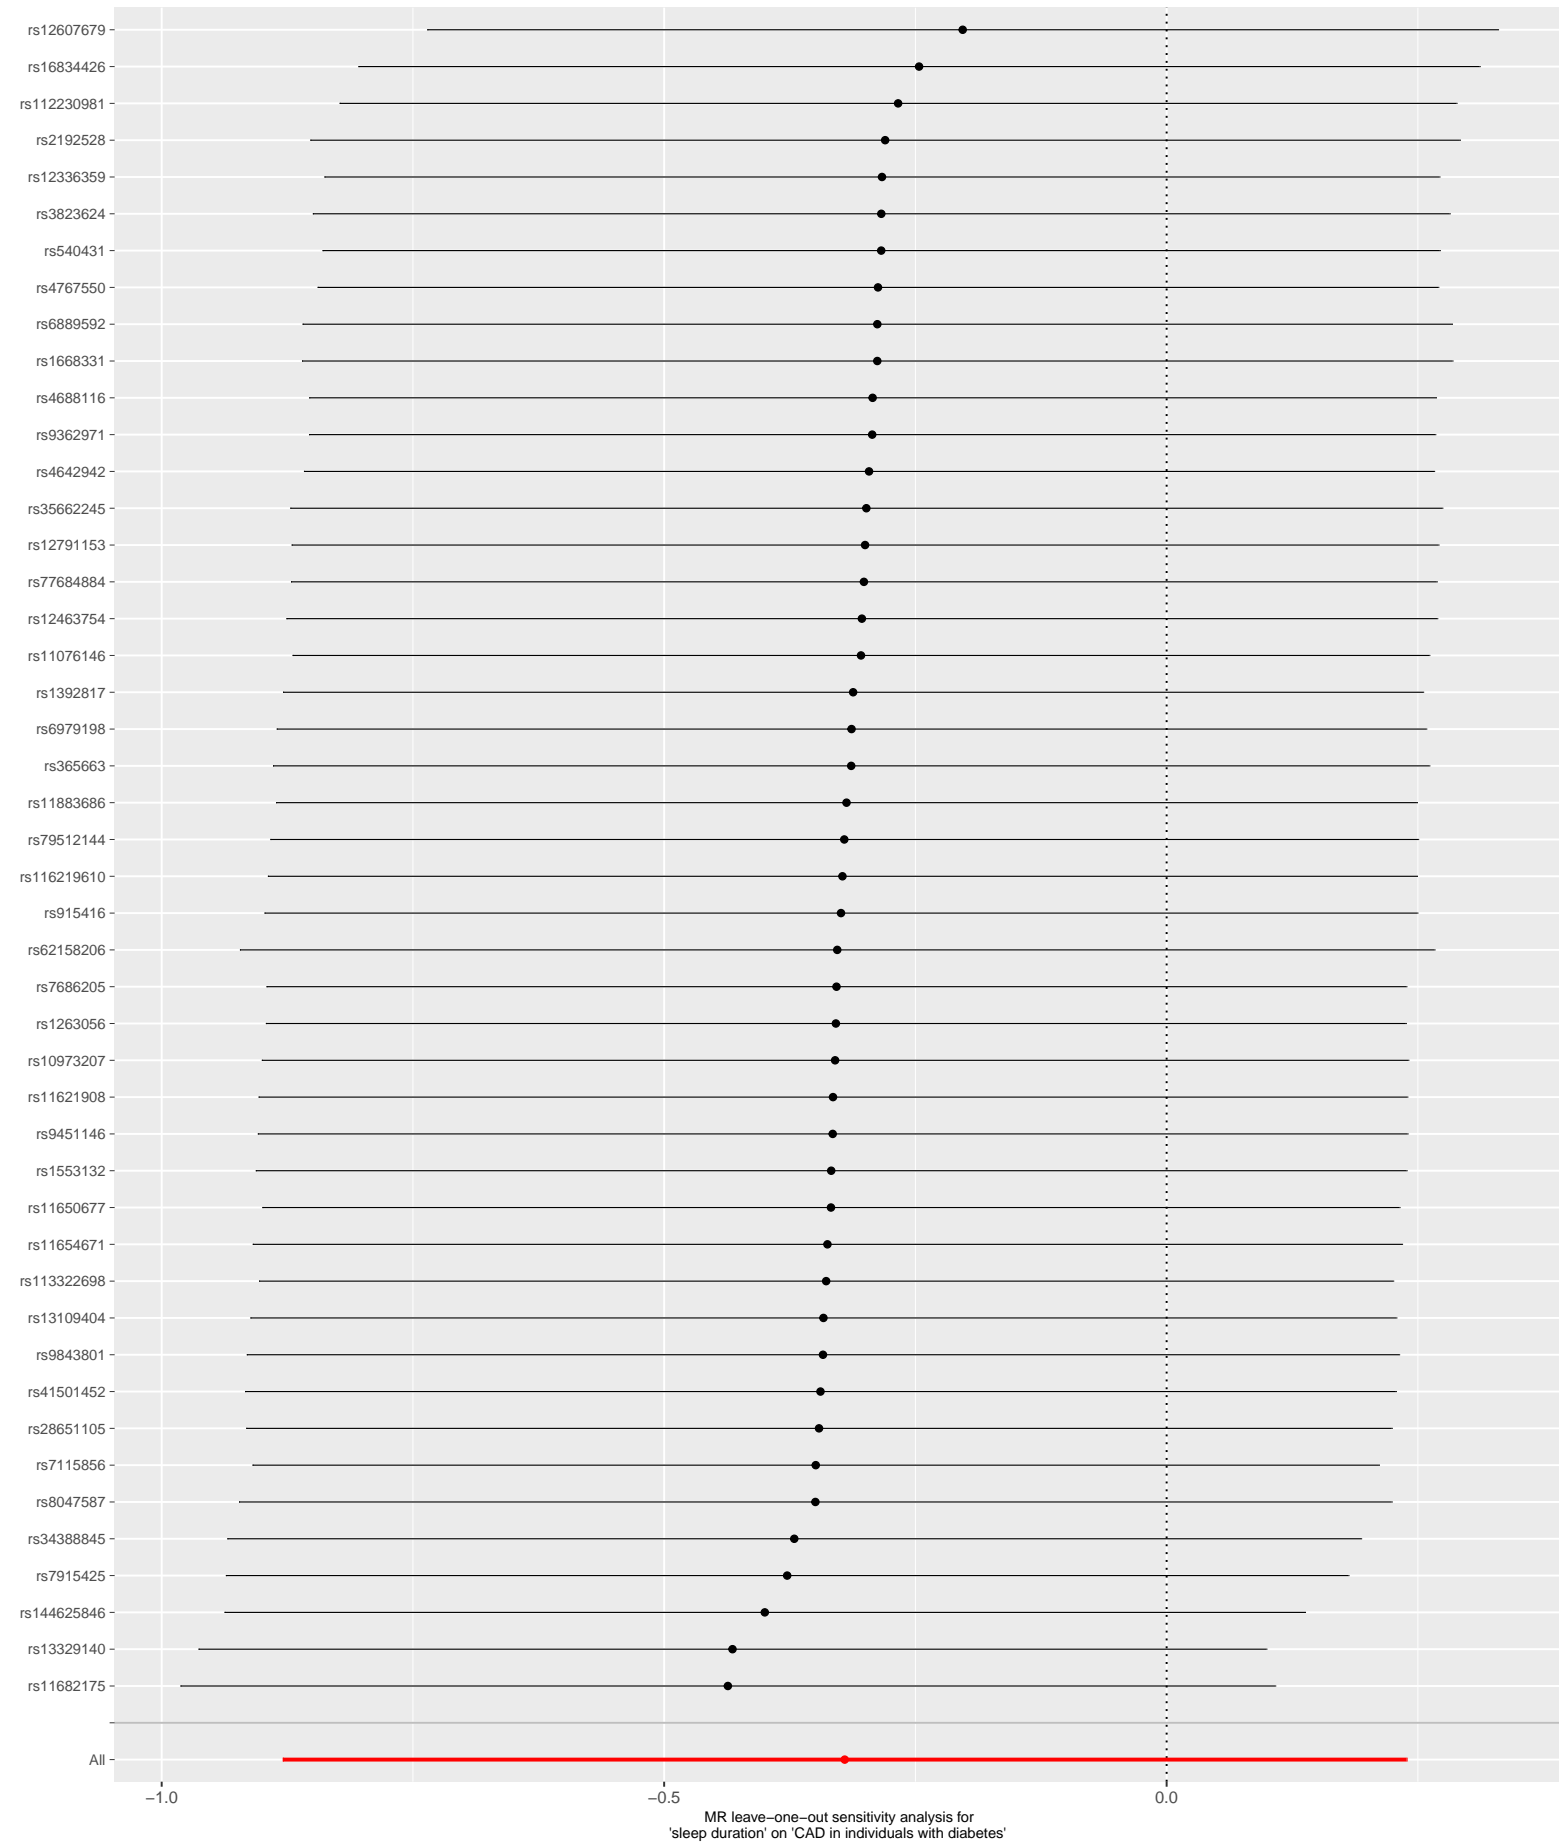

e

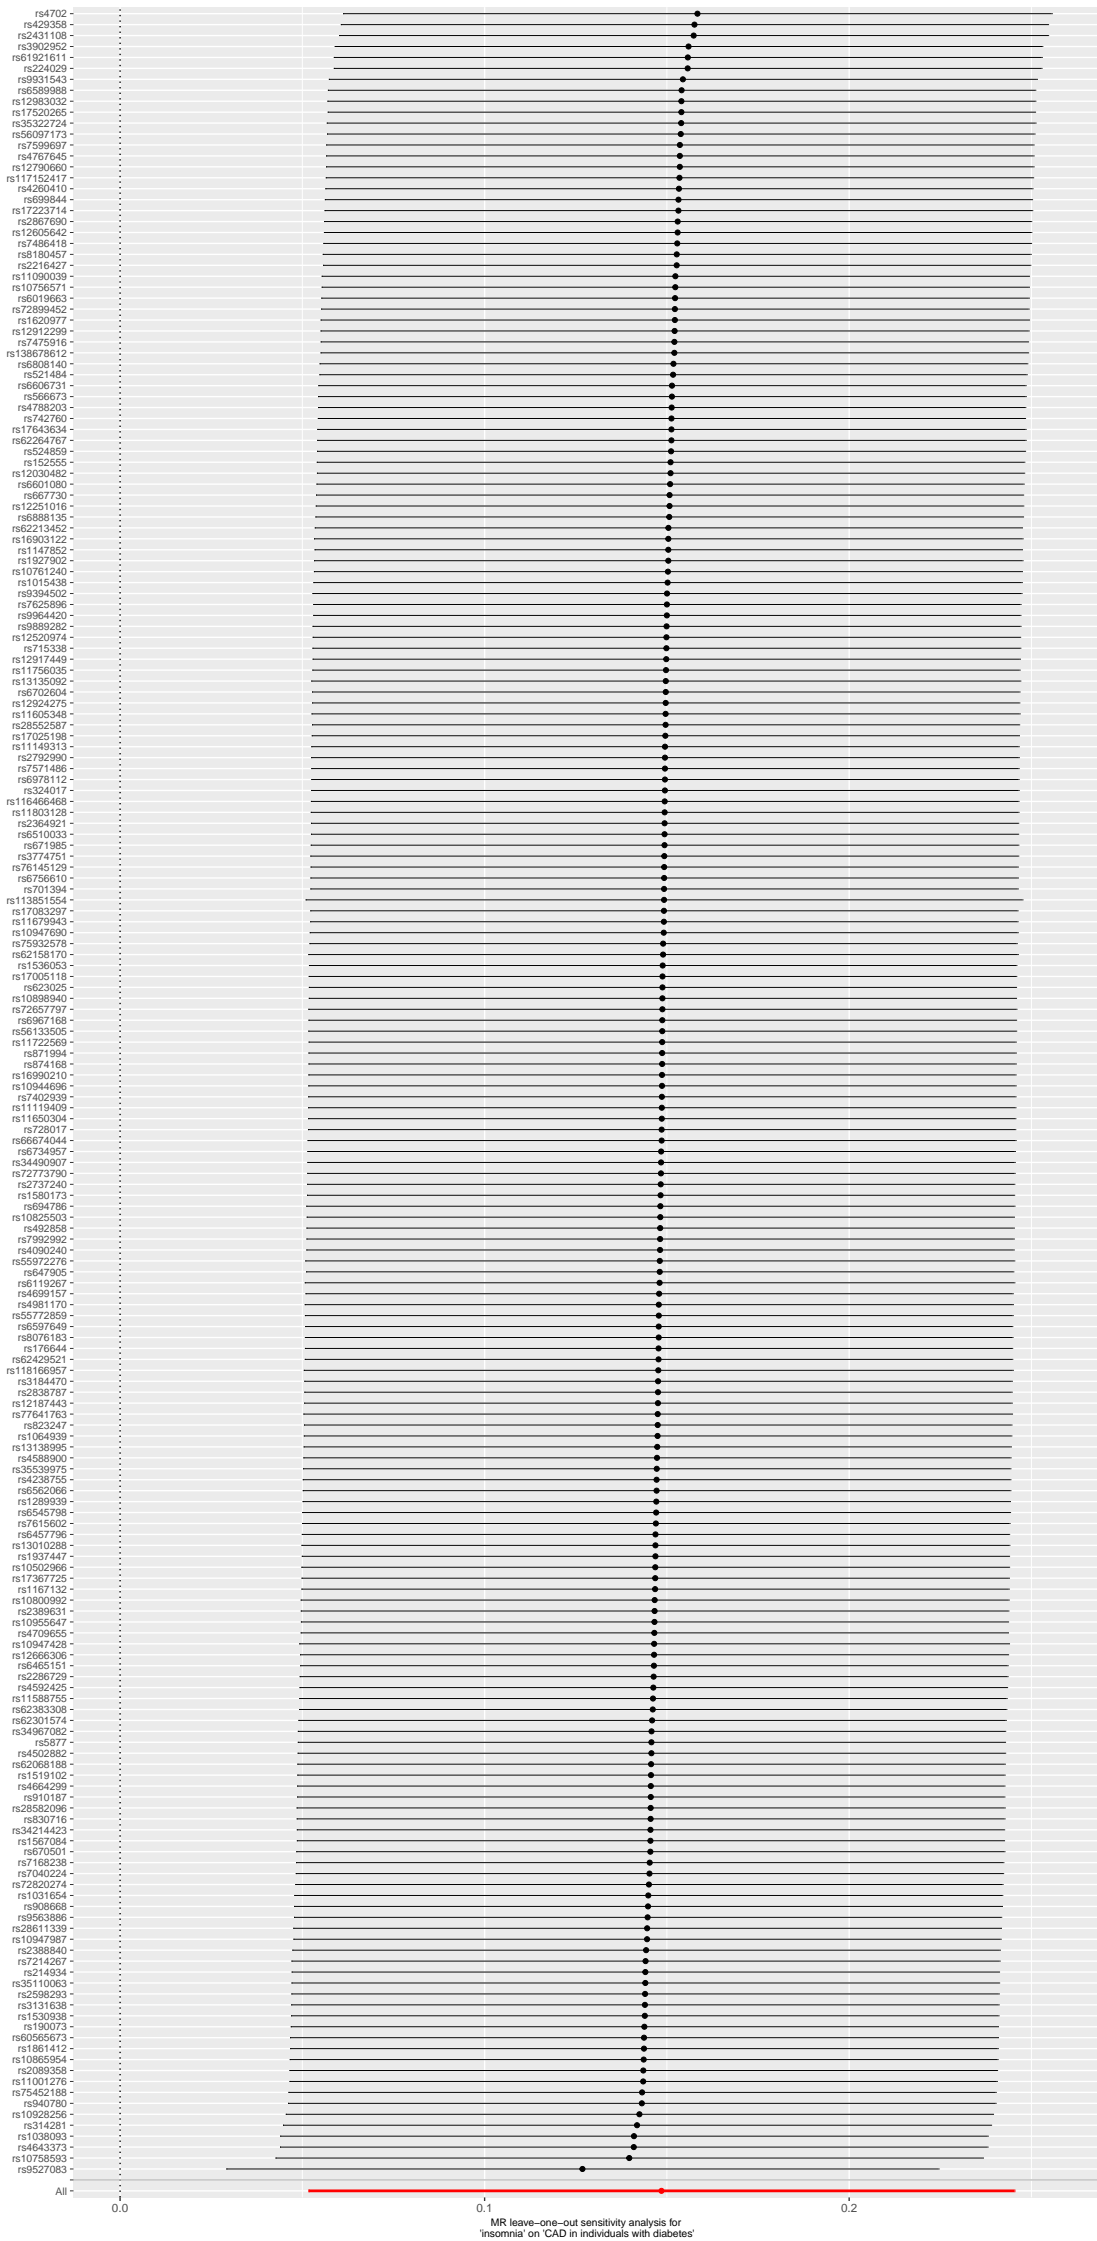

f

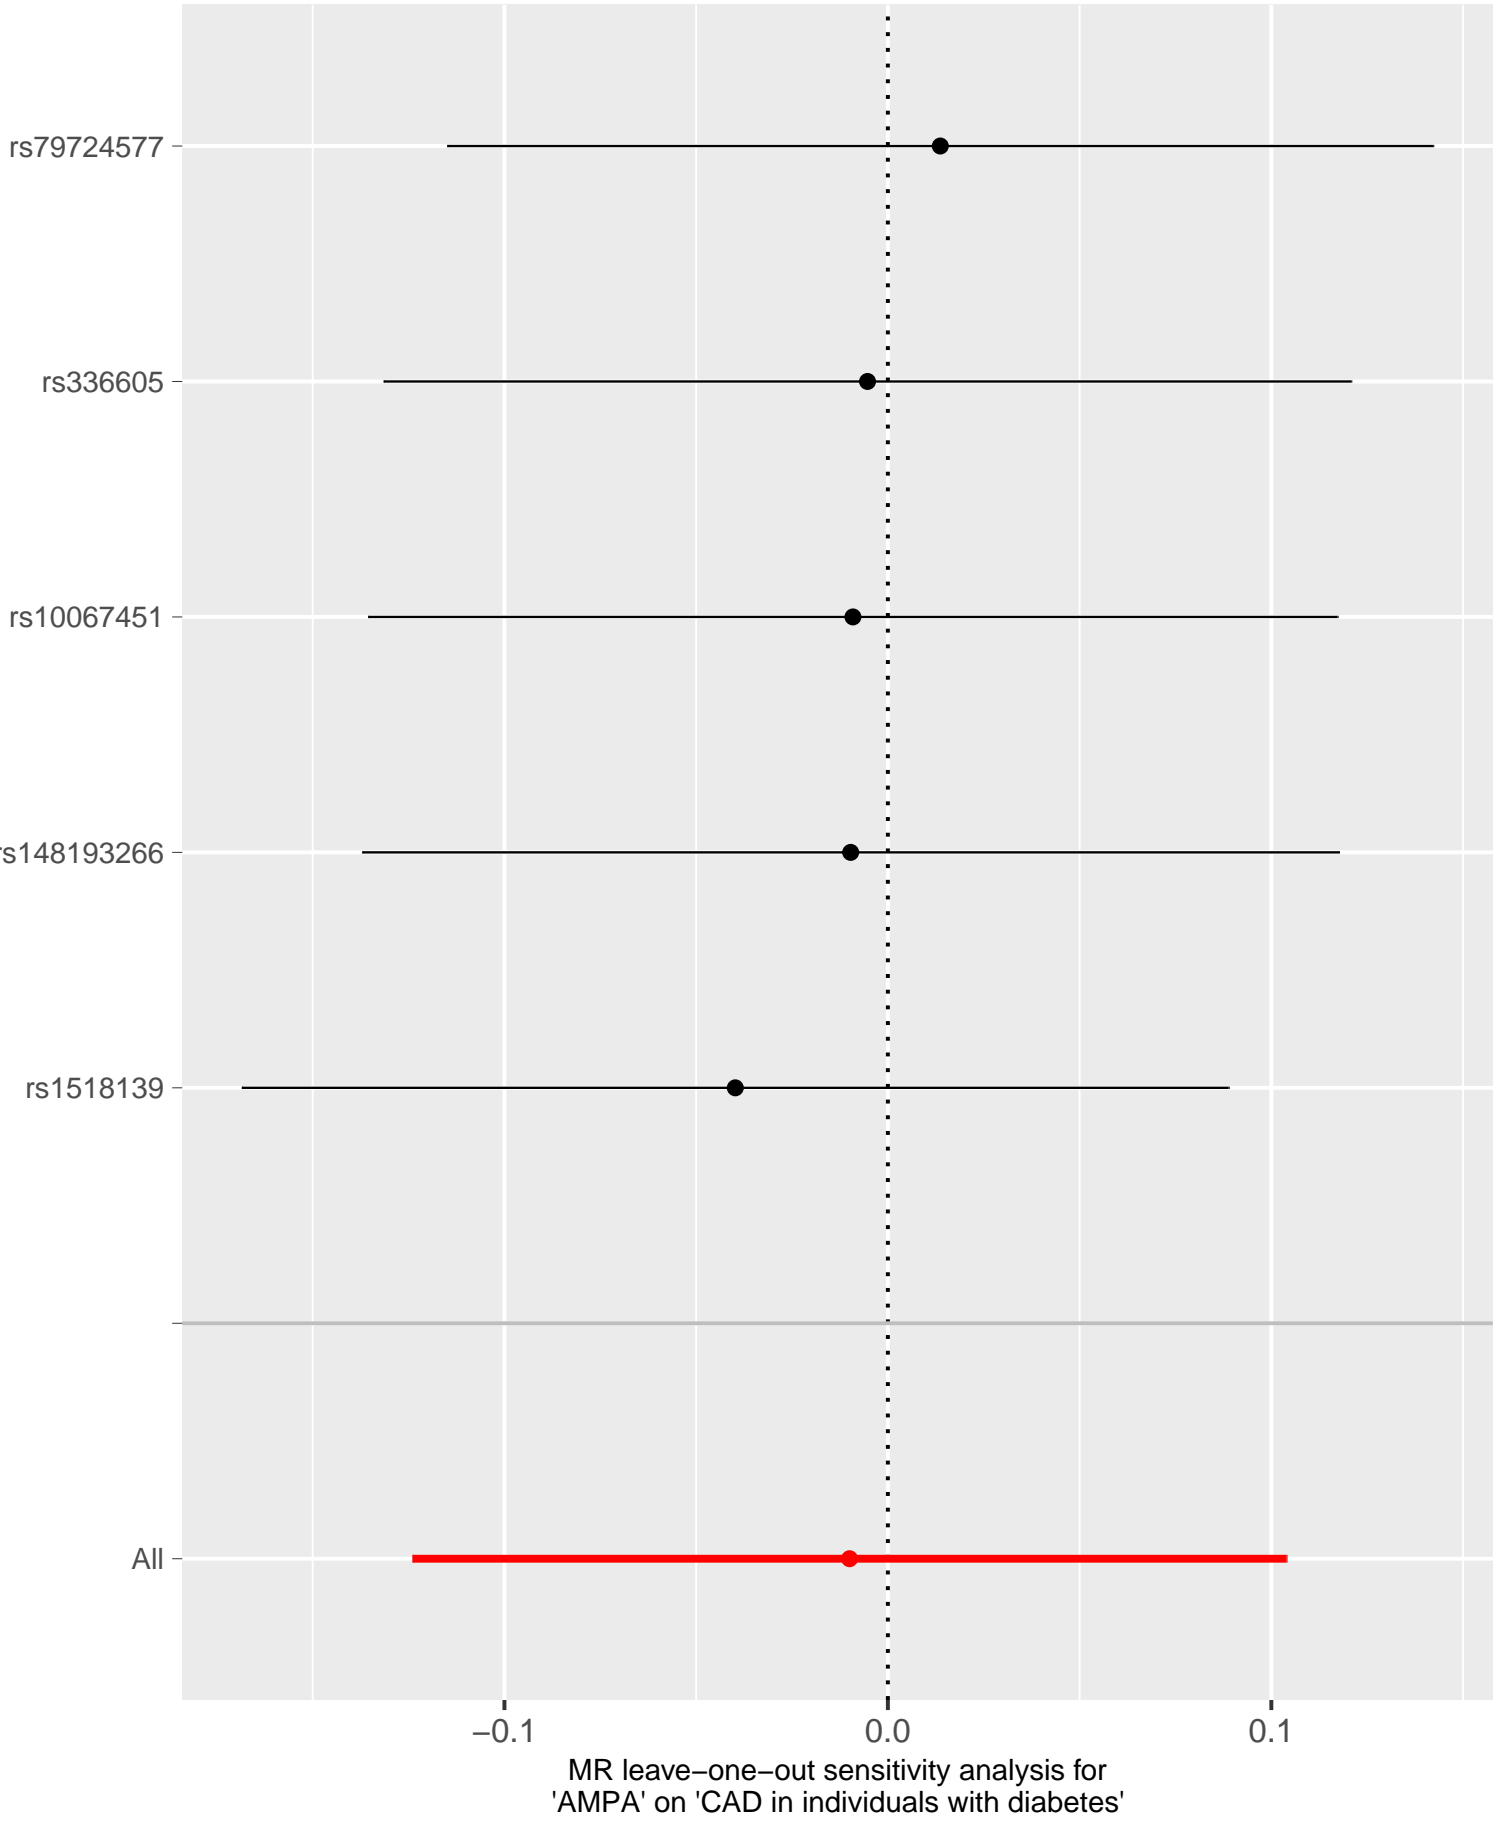

g

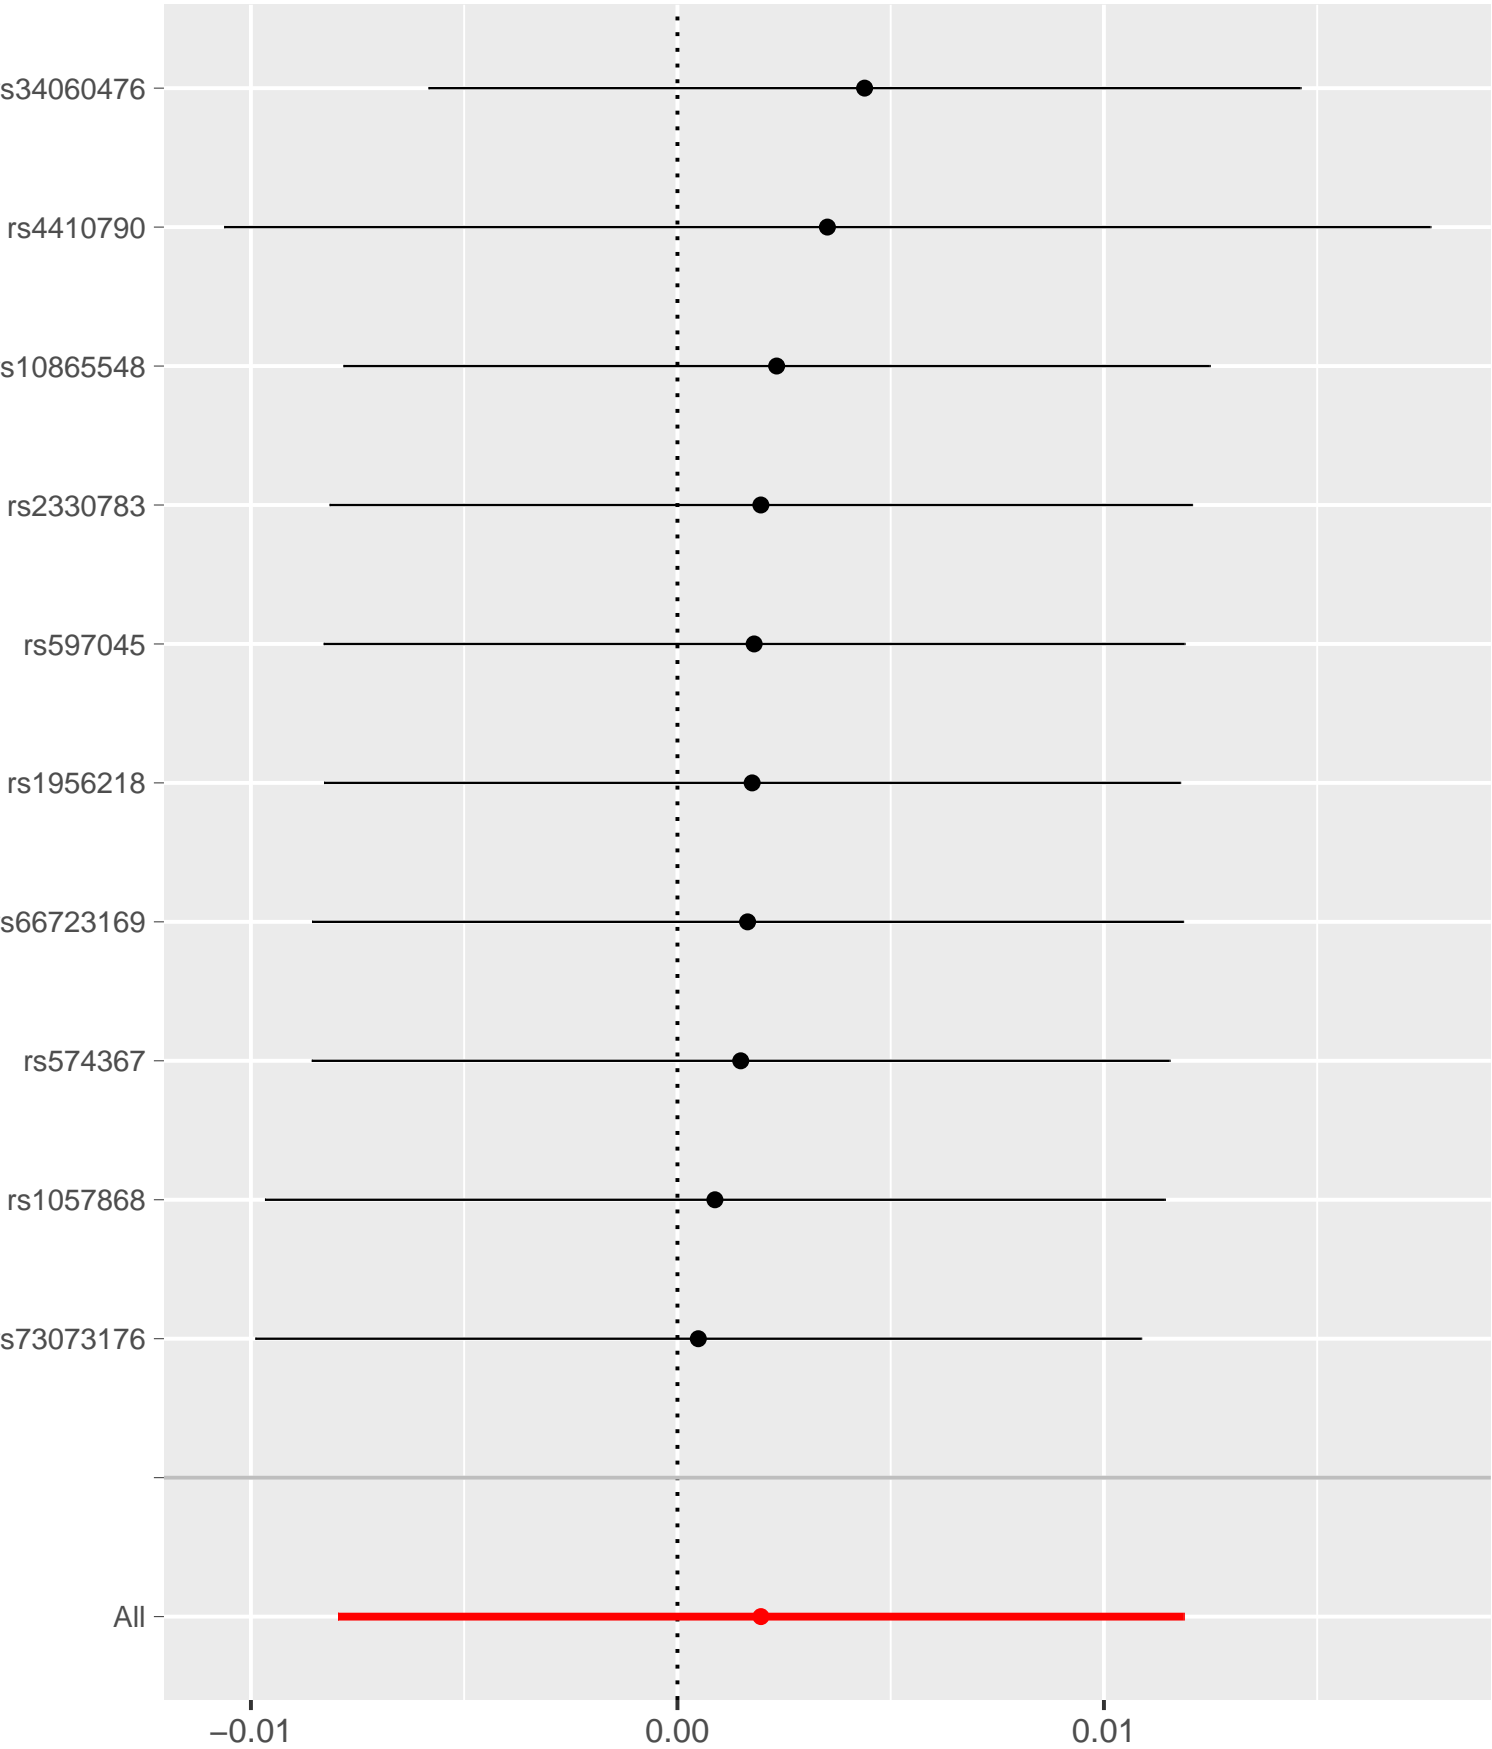



# h

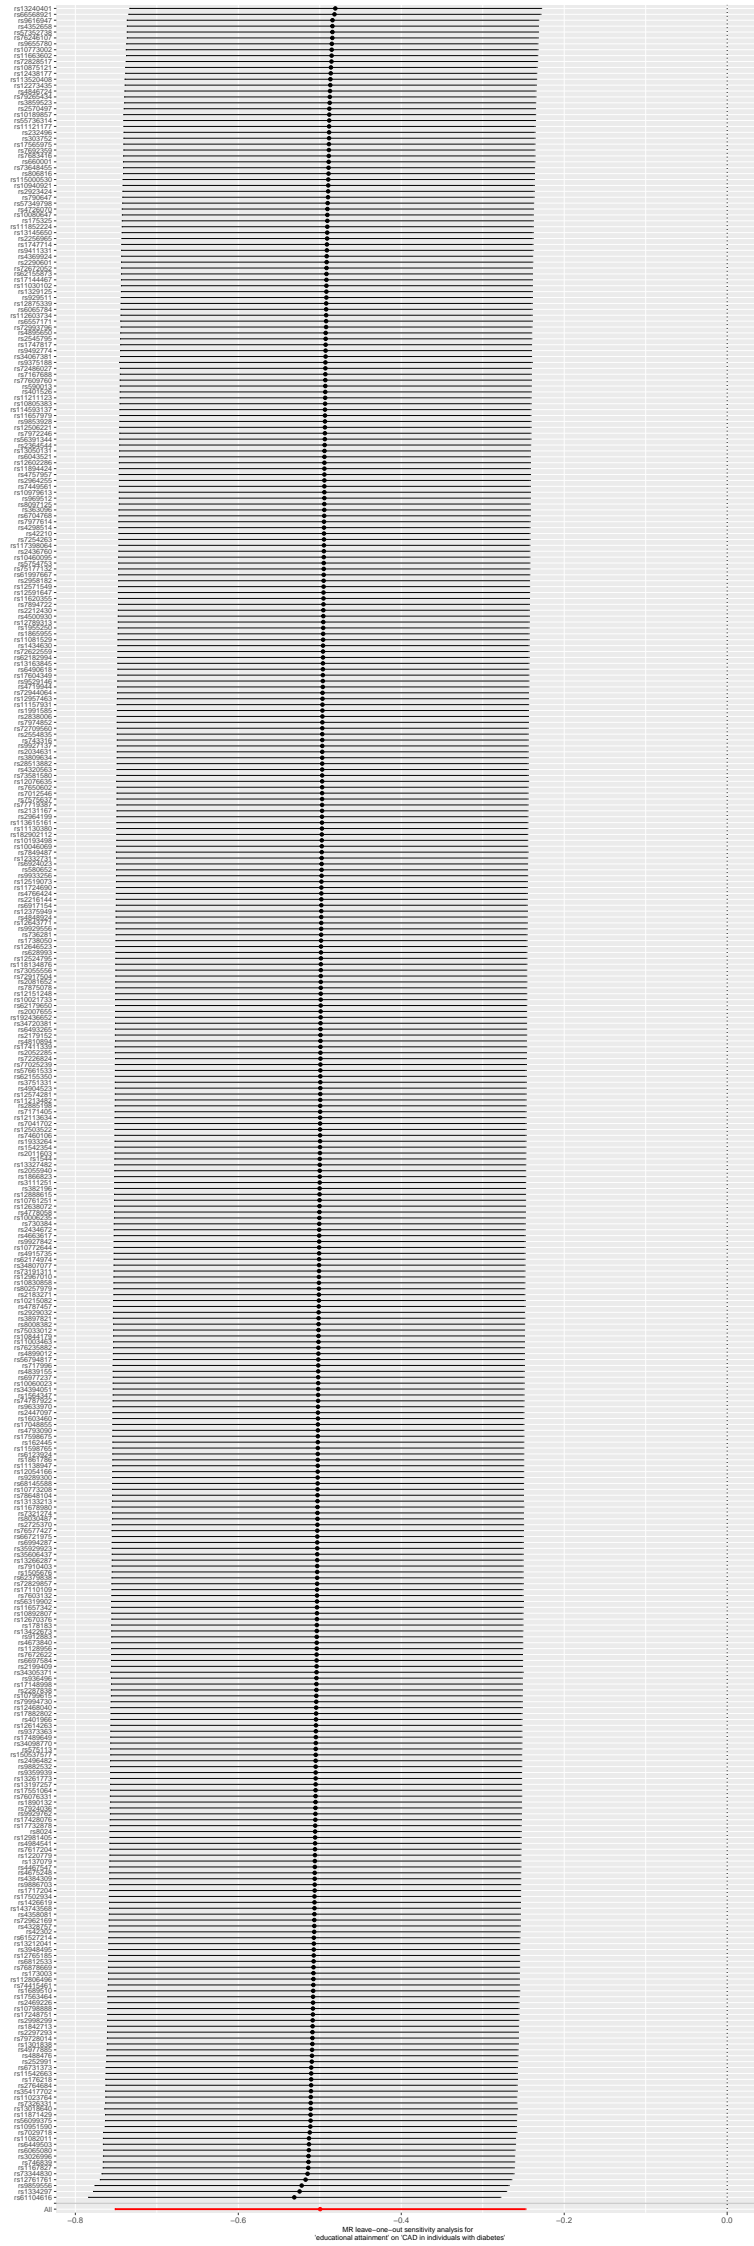

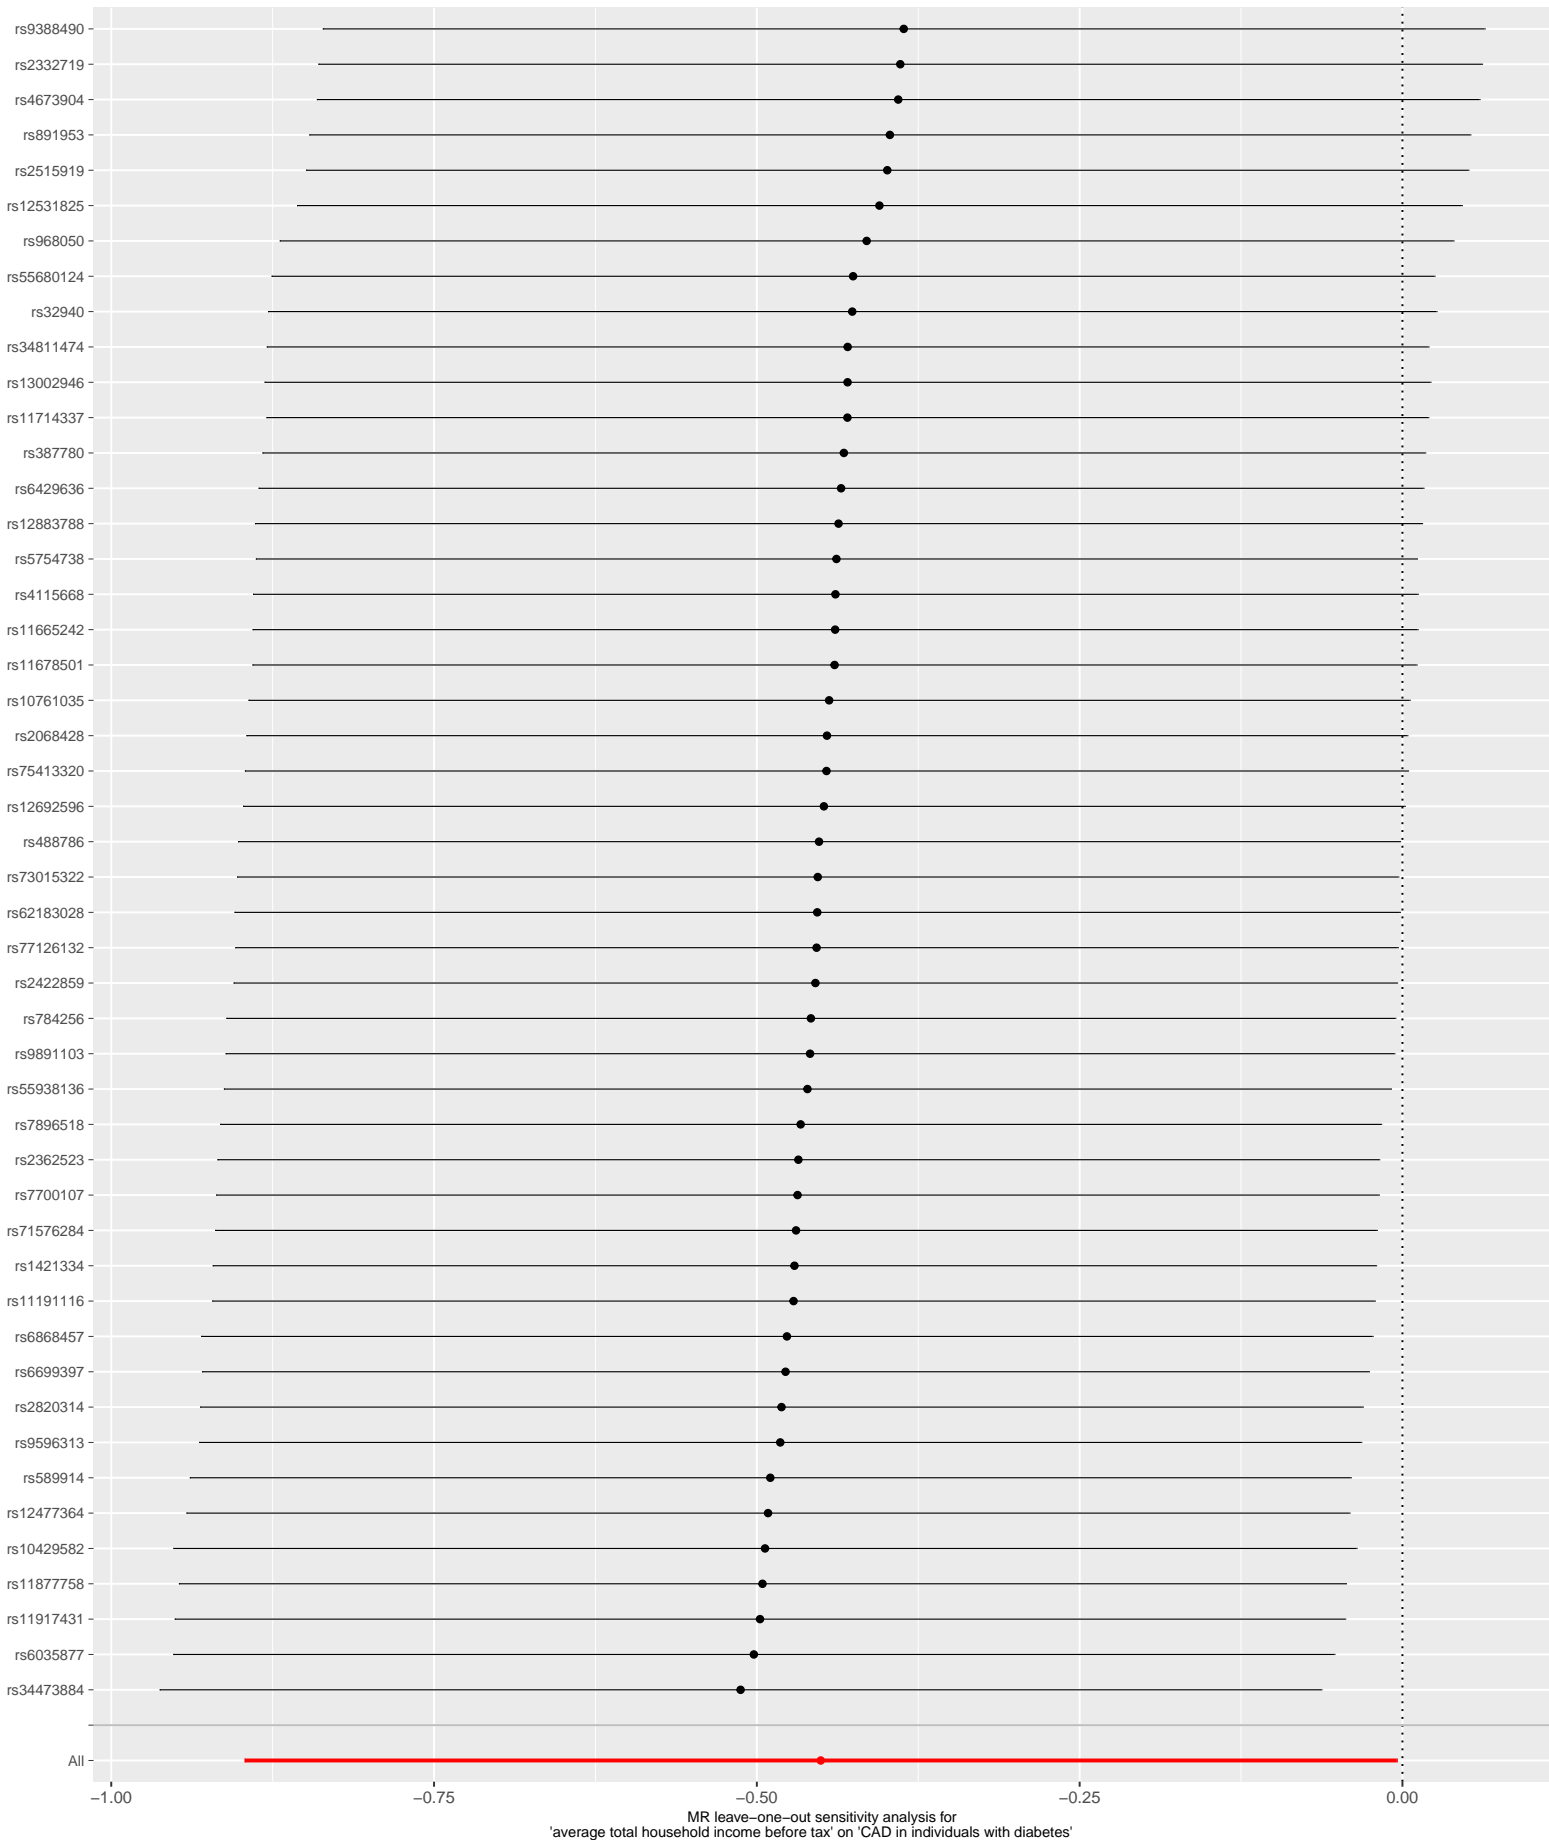

j

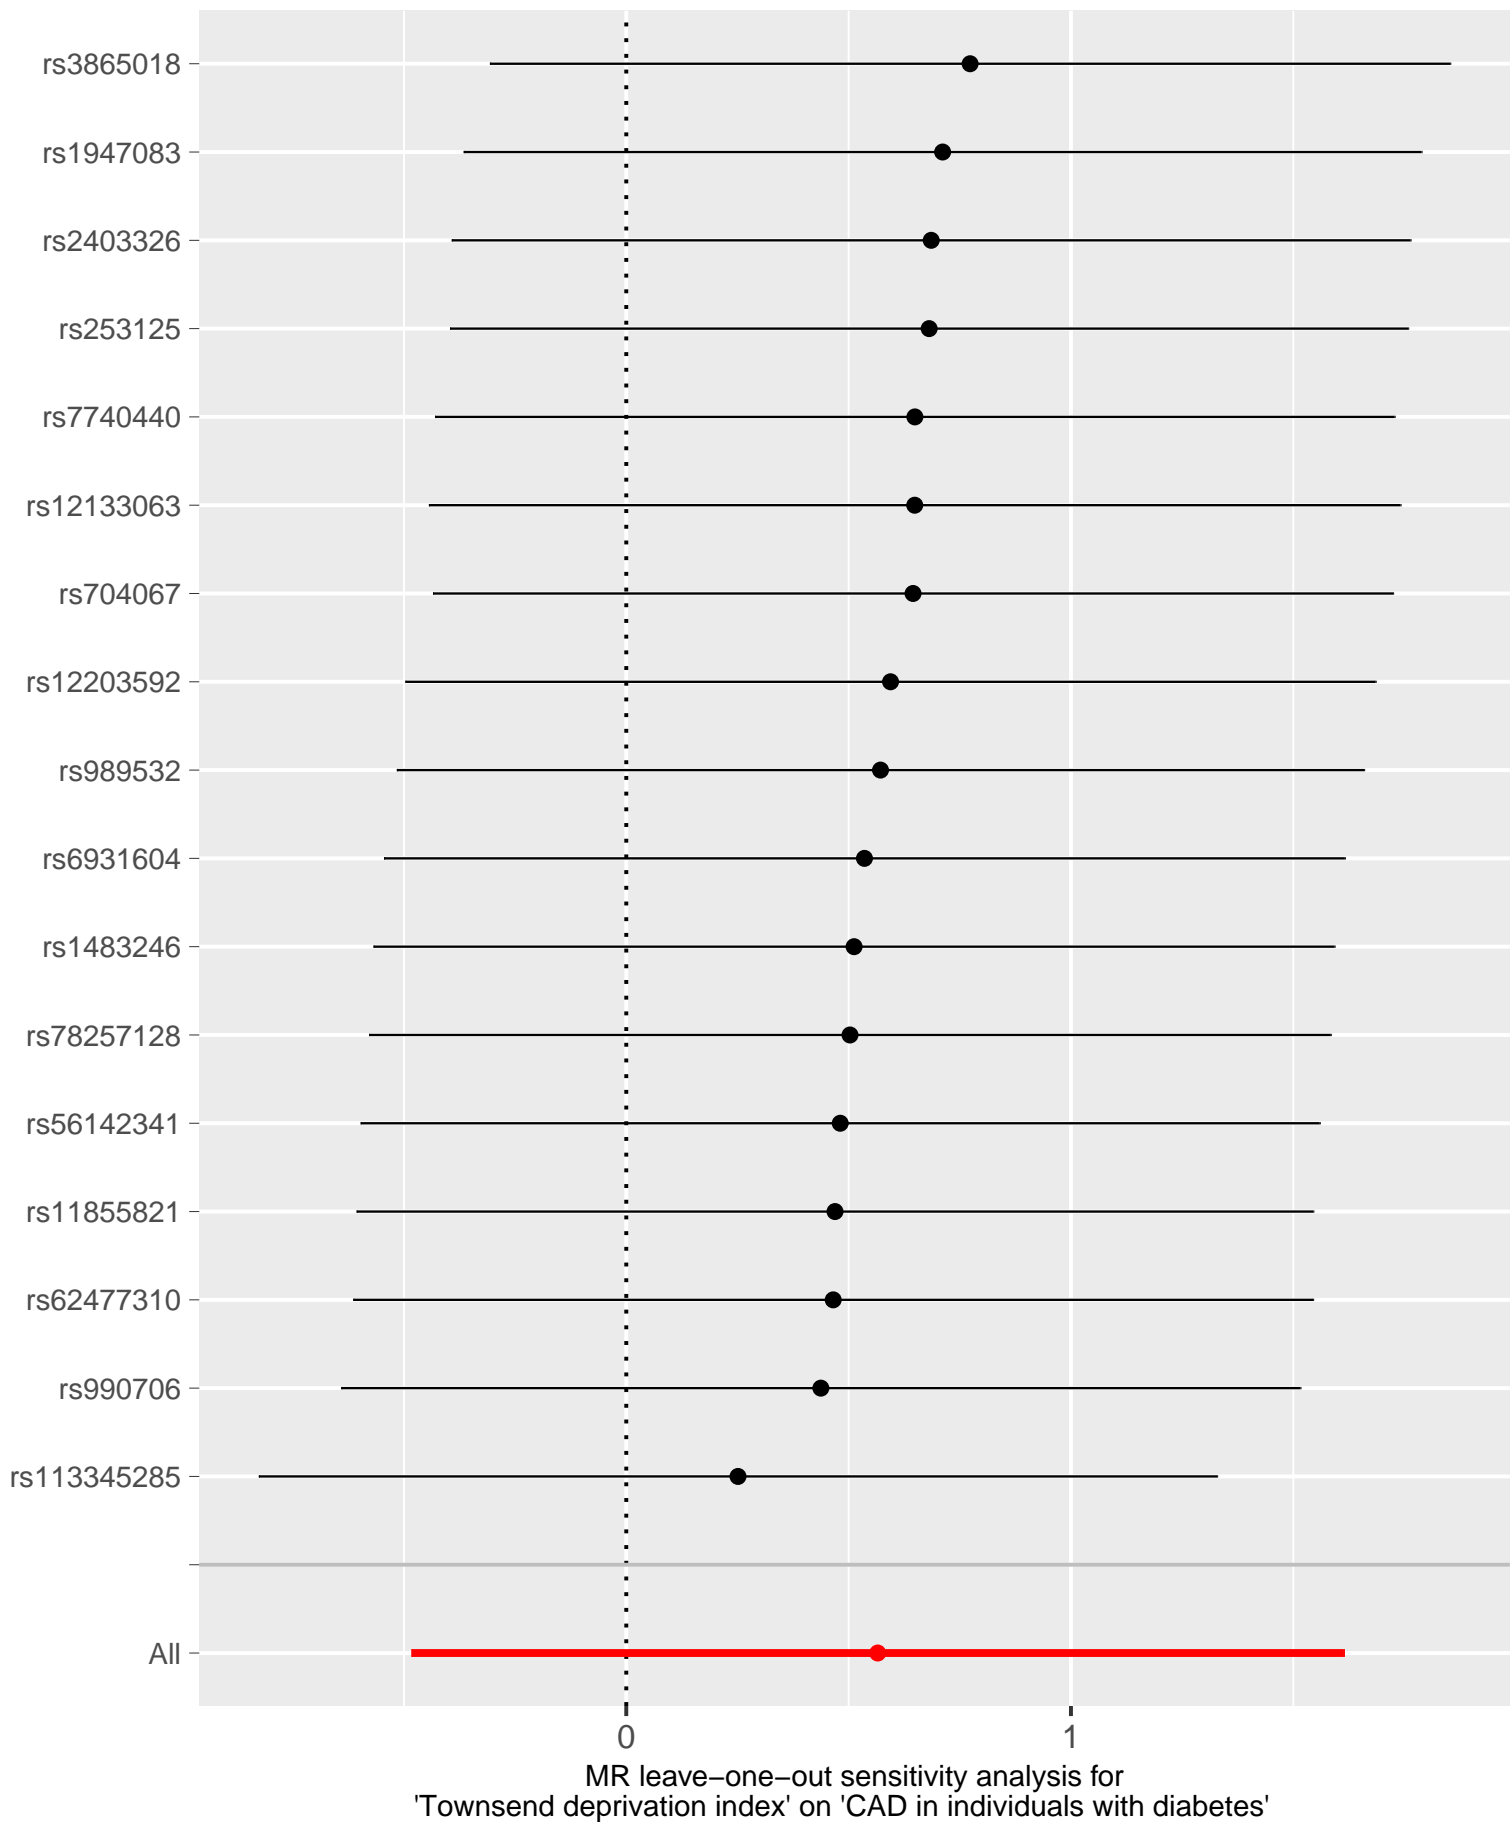

Supplement: Data_Sheet_1.PDF [file Data_Sheet_1.PDF]
